# Supplementary material for: The Toxicological Risk Assessment of Dermal Exposure of Patients Exposed to Lead and Cadmium Due to Application of Ointments with Marjoram Herb Extract (Majoranae herbae extractum)
Source: MDPI journal article supplement (doi:10.3390/ijerph20032701), 2023-02-02
Supplement: s1 [file s1]

## Supplementary Materials S2

### 1. The AAS operating conditions.

| Operating parameters                       | heavy metal |           |
|--------------------------------------------|-------------|-----------|
|                                            | lead        | cadmium   |
| Wavelength [nm]                            | 283.3       | 228.8     |
| Slit width [nm]                            | 0.7         | 0.7       |
| Lamp current [mA]                          | 8           | 5         |
| Optimum working range [ $\mu\text{g/kg}$ ] | 1.0-10.0    | 0.02-0.20 |

### 2. Time-temperature program in the graphite furnace atomic absorption spectrometer in lead and cadmium determination.

#### Lead

| Step | Temperature [ $^{\circ}\text{C}$ ] | Ramp [s] | Hold [s] | Gas Flow [ $\text{mL/min}$ ] |
|------|------------------------------------|----------|----------|------------------------------|
| 1    | 120                                | 1        | 30       | 250                          |
| 2    | 950                                | 10       | 20       | 250                          |
| 3    | 1450                               | 0        | 5        | 0                            |
| 5    | 2400                               | 1        | 2        | 250                          |

#### Cadmium

| Step | Temperature [ $^{\circ}\text{C}$ ] | Ramp [s] | Hold [s] | Gas Flow [ $\text{mL}\cdot\text{min}^{-1}$ ] |
|------|------------------------------------|----------|----------|----------------------------------------------|
| 1    | 120                                | 10       | 25       | 250                                          |
| 2    | 300                                | 5        | 15       | 250                                          |
| 3    | 1600                               | 0        | 3        | 0                                            |
| 5    | 2400                               | 1        | 2        | 250                                          |

### 3. A microwave-assisted digestion procedure

|                | Step 1 | Step 2 | Step 3 | Step 4 | Step 5 |
|----------------|--------|--------|--------|--------|--------|
| Power [W]      | 80     | 100    | 100    | 0      | 0      |
| PSI            | 80     | 100    | 150    | 20     | 20     |
| Time [minutes] | 6:00   | 6:30   | 7:00   | 5:00   | 5:00   |
| TAP [minutes]  | 2:00   | 5:00   | 5:00   | 0      | 0      |
| Fan power [%]  | 100    | 100    | 100    | 100    | 100    |

Abbreviations: PSI – pounds-force per square inch; TAP – time at pressure min.
