# Supplementary material for: The Toxicological Risk Assessment of Dermal Exposure of Patients Exposed to Lead and Cadmium Due to Application of Ointments with Marjoram Herb Extract (Majoranae herbae extractum)
Source: MDPI journal article supplement (doi:10.3390/ijerph20032701), 2023-02-02
Supplement: s1 [file s1]

## Supplementary Materials S1

Short description of analyzed samples.

| Sample |      | latin description                                     | license      | note |
|--------|------|-------------------------------------------------------|--------------|------|
| No.    | Code |                                                       |              |      |
| 1.     | A    | <i>Majoranae herbae extractum</i>                     | IL-2800/LN   | OTC  |
| 2.     | B    | <i>Majoranae unguentum</i>                            | 20902        | OTC  |
| 3.     | C    | <i>Majoranae unguentum</i>                            | IL-3036/LN   | OTC  |
| 4.     | D    | <i>Majoranae herbae extractum/Majoranae unguentum</i> | IL-2601/LN   | OTC  |
| 5.     | E    | <i>Majoranae unguentum</i>                            | IL – 3581/LN | OTC  |

OTC - over-the-counter.
